# Supplementary material
Source: PubMed Central journal article supplement (PMC3553756)
Supplement: AEM.02581-12_zam999104026so1.pdf [file AEM.02581-12_zam999104026so1.pdf]

1 **Table S1. N-terminal sequences of recently identified ABPs of oral streptococci matched to**  
 2 **available protein sequences in NCBI (<http://www.ncbi.nlm.nih.gov/protein/>).**

| <b>Streptococcus strain</b>    | <b>ABP (kDa)</b> | <b>N-terminal sequence</b>             | <b>NCBI protein sequence match, Gene Description, Protein Accession</b>                                   |
|--------------------------------|------------------|----------------------------------------|-----------------------------------------------------------------------------------------------------------|
| <i>S. cristatus</i> CR311      | 82               | ( )E(Y)E(D)SDR( )( )L                  | NI                                                                                                        |
| <i>S. cristatus</i> CR311      | 30               | ENPINGGANT                             | $\alpha$ -amylase-binding protein AbpA [ <i>Streptococcus cristatus</i> ATCC 51100] ZP_08060042           |
| <i>S. salivarius</i> KBC05     | 29               | DINGGANT(E)GA                          | $\alpha$ -amylase-binding protein AbpA [ <i>Streptococcus salivarius</i> M18] EGX30989                    |
| <i>S. mitis</i> NCTC10712      | 20               | DEATDAARNN                             | $\alpha$ -amylase binding protein AbpA [ <i>Sreptococcus gordonii</i> Challis, substr. CH1 ] YP_001451353 |
| <i>S. parasanguinis</i> MGH413 | 87               | (D)EGFIIGRQLT<br>(T)(I)LE(Q)(L)(Y)V SD | AbpB family dipeptidase lipoprotein [ <i>Streptococcus parasanguinis</i> ATCC 15912] ZP_06899738.1        |
| <i>S. parasanguinis</i> MGH    | 21               | QGENPSSSNQ<br>AVP(K)(D) (D)A           | $\alpha$ -amylase-binding protein AbpA [ <i>Streptococcus parasanguinis</i> ATCC 15912 ] ZP_06899569.1    |

3 (NI) – No information  
 4  
 5  
 6

6 **Supplemental Figure Legends**

7

8

9 **Figure S1. Ribbon structures of  $\alpha$ -amylase-binding proteins.** (A) AbpA of *S. gordonii* and (B) AbpC  
10 of *S. mitis*. AbpA and AbpC share no similarity in secondary structure as predicted by protein modeling  
11 server JUFO 3D (<http://www.meilerlab.org/>) (54). This server offers a protein secondary structure  
12 prediction from its primary sequence and a three dimensional model.

13

14 **Figure S2.** Multiple sequence alignment of AbpA-like proteins from various oral streptococci.

15

16

17 **Figure S3. Dotplot alignment.** AbpA of *S. gordonii* and AbpC of *S. mitis* showing similarity of the  
18 amino-acids within the middle region of the proteins. (Geneious Basic 5.4.3 URL: [www.geneious.com](http://www.geneious.com) )

19

20

20 **Figure S1.**

21

22

**A**

23

24

25

26

27

28

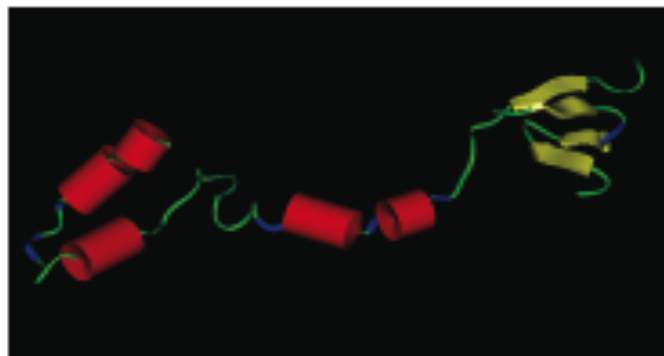

29

**B**

30

31

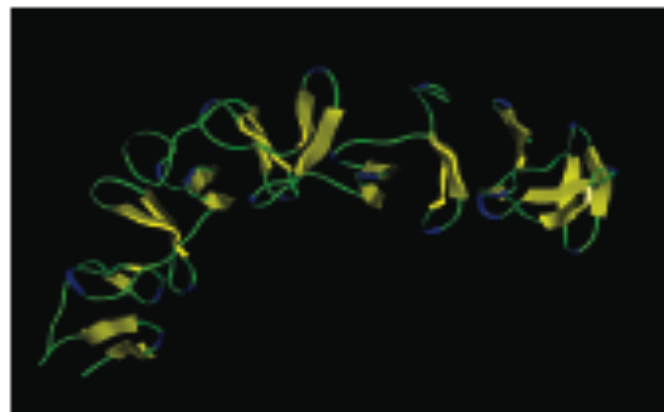

32 **Figure S2.**

- 33  
 34 1) amylase-binding protein AbpA [*Streptococcus gordonii* str. Challis substr. CH1  
 35 2) amylase-binding protein AbpA [*Streptococcus cristatus* ATCC 51100]  
 36 3) amylase-binding protein AbpA [*Streptococcus australis* ATCC 700641]  
 37 4) possible amylase-binding protein AbpA [*Streptococcus parasanguinis* ATCC 15912  
 38 5) amylase-binding protein AbpA [*Streptococcus infantis* SK1302]  
 39  
 40

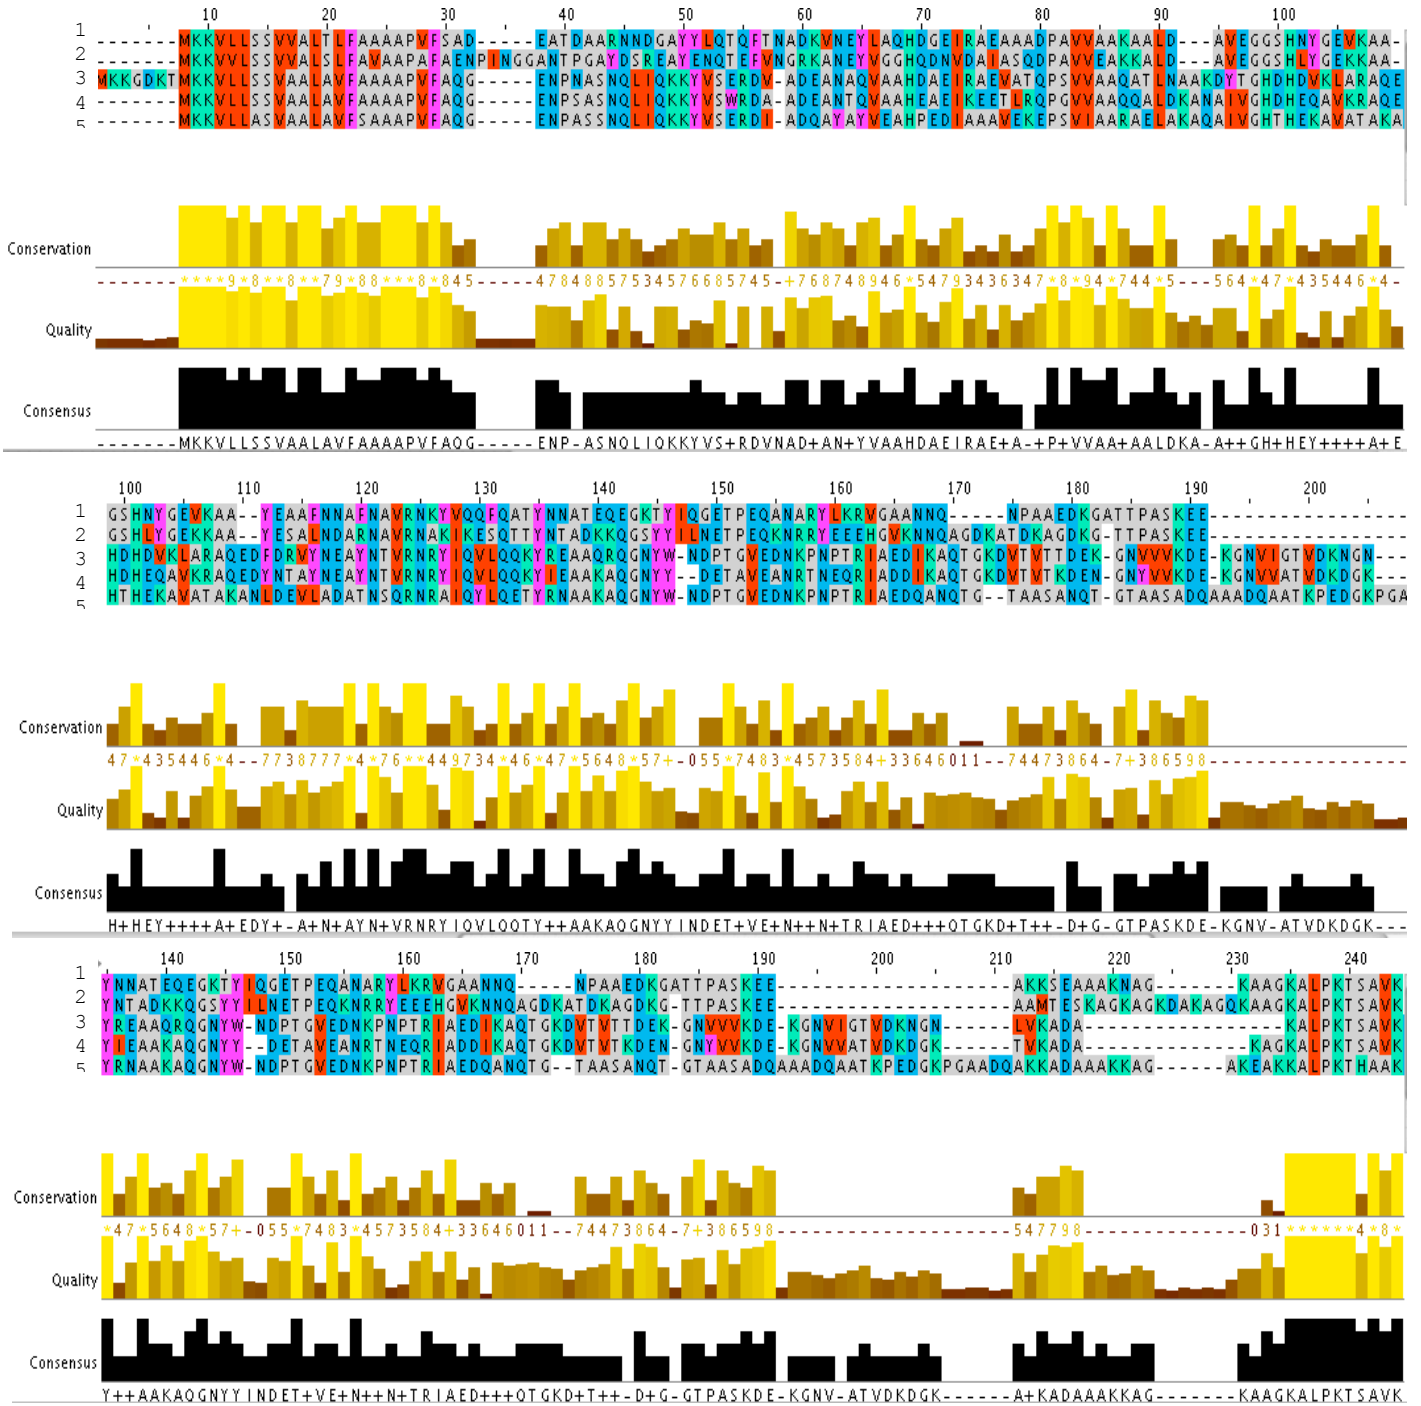

41 **Figure S3.**

42  
43  
44

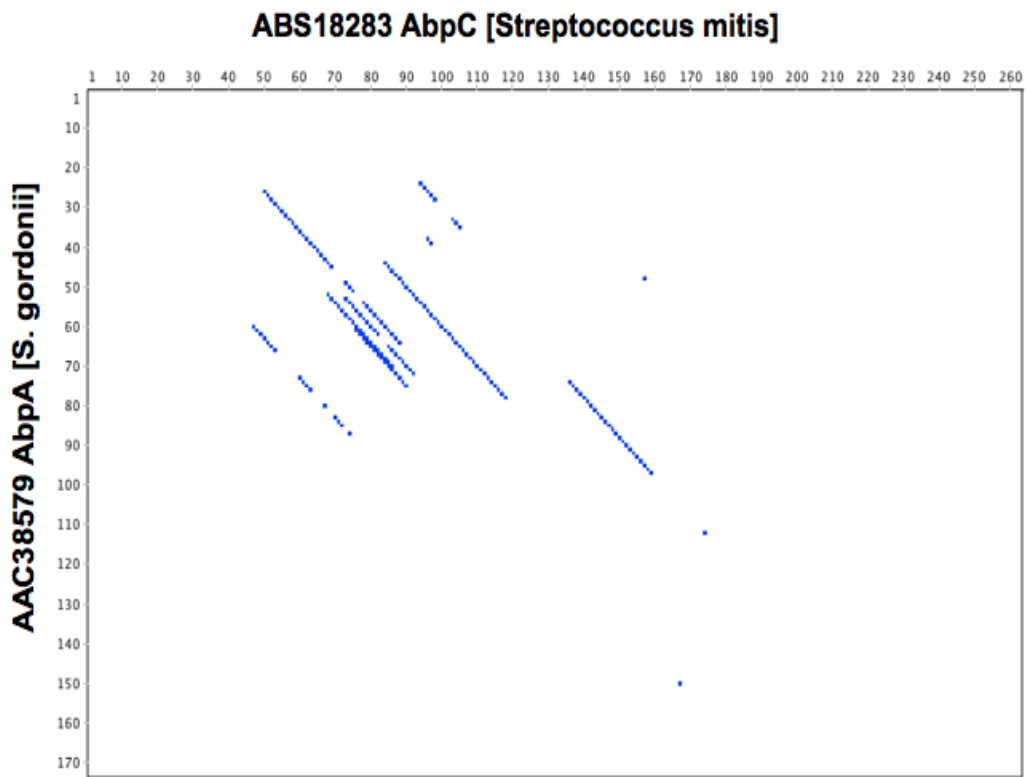

**Dotplot alignment of AbpA and AbpC amino acid sequences**
